# Supplementary material
Source: publisher figshare collection journal article supplement (https://sage.figshare.com/ndownloader/files/23757734)
Supplement: Supplementary file 1 [file 23757734]

# SAGE AUTHORSHIP CHANGE REQUEST

## INSTRUCTIONS:

Please complete all sections of this form. We require that **all** authors (including current co-authors, those to be added and those to be removed) sign the relevant sections below. We require all signatures on the same copy of the form. Once complete, please email the form back to the sender.

## SECTION ONE: PAPER INFORMATION

|                                                                                                                            |                           |  |
|----------------------------------------------------------------------------------------------------------------------------|---------------------------|--|
| JOURNAL NAME                                                                                                               | Vascular                  |  |
| PAPER TITLE                                                                                                                | MANUSCRIPT ID NUMBER      |  |
| Peripheral artery disease in outpatients with a recent history of acute coronary syndrome or at high atherothrombotic risk | VASCULAR-09-19-OA-1597.R2 |  |

## SECTION TWO: ESSENTIAL CONDITIONS FOR CHANGE

The new author list should contain only those who can legitimately claim authorship. This is all those who:

- 1) Have made a substantial contribution to the concept or design of the article; or the acquisition, analysis, or interpretation of data for the article; AND
- 2) Drafted the article or revised it critically for important intellectual content; AND
- 3) Approved the version to be published; AND
- 4) Agreed to be accountable for all aspects of the work in ensuring that questions related to the accuracy or integrity of any part of the work are appropriately investigated and resolved.

NB: Registered authors should meet the conditions of all of the points above. All contributors who do not meet the criteria for authorship should instead be listed in an 'Acknowledgements' section.

## SECTION THREE: REASON FOR AUTHORSHIP CHANGE

|                                                                                                                                                                                                                                                                                                                                                                                                                                                                                                                                                                                                                                                                                                                                                                            |
|----------------------------------------------------------------------------------------------------------------------------------------------------------------------------------------------------------------------------------------------------------------------------------------------------------------------------------------------------------------------------------------------------------------------------------------------------------------------------------------------------------------------------------------------------------------------------------------------------------------------------------------------------------------------------------------------------------------------------------------------------------------------------|
| Please provide a detailed explanation for the change in authors in the box below.                                                                                                                                                                                                                                                                                                                                                                                                                                                                                                                                                                                                                                                                                          |
| Ana Ochoa-Guzmán MD, PhD, has made substantial contribution to improve this paper, from the first revision of the original version sent to VASCULAR, in the form of:<br><br>-Data base revision and re-construction<br>-Statistical analyses review and corrections (as indicated by the Reviewers).<br>-Language and scientific content editing.<br><br>The work of Dr. Ochoa-Guzmán has been determinant for reaching the quality of the new version of our paper, and therefore, she has gained the merit to be included as co-author, in the understanding that she has approved all the manuscript versions submitted to VASCULAR, and that she had agreed to take responsibility for the information and all interpretations and claims presented in our manuscript. |

We agree to the proposed change of authorship to the above paper. NB: all authors (added and removed) must sign below.

[illegible]
